# Supplementary material for: Influence of Mechanical Skin Treatments on Dermal Penetration Efficacy of Active Ingredients
Source: MDPI journal article supplement (doi:10.3390/pharmaceutics14091788), 2022-08-26
Supplement: s1 [file s1]

## Article

# Influence of mechanical skin treatments on dermal penetration efficacy of active ingredients

Cornelia M. Keck \*, Em-on Chaiprateep, Henriette Dietrich, and Soma Sengupta

Department of Pharmaceutics and Biopharmaceutics, Philipps Universität Marburg, 35037 Marburg, Germany

\* Correspondence: cornelia.keck@pharmazie.uni-marburg.de; Tel.: +49 6421 282 5881

## Supplementary material:

**Table S1:** macros used for automated threshold algorithms. Left: macro used for images obtained from the skin sections treated with sodium fluorescein solution, Right: macro used for images obtained from the skin sections treated with Nile red solution.

| macro used for images obtained from the skin sections<br>treated with sodium fluorescein solution                                                                                                                                                                                                                                                                                                                                                           | macro used for images obtained from the skin sections<br>treated with Nile red solution                                                                                                                                                                                                                                                                                                                                                                      |
|-------------------------------------------------------------------------------------------------------------------------------------------------------------------------------------------------------------------------------------------------------------------------------------------------------------------------------------------------------------------------------------------------------------------------------------------------------------|--------------------------------------------------------------------------------------------------------------------------------------------------------------------------------------------------------------------------------------------------------------------------------------------------------------------------------------------------------------------------------------------------------------------------------------------------------------|
| <pre>// Color Thresholder 1.53k // Autogenerated macro, single images only! min=newArray(3); max=newArray(3); filter=newArray(3); a=getTitle(); run("RGB Stack"); run("Convert Stack to Images"); selectWindow("Red"); rename("0"); selectWindow("Green"); rename("1"); selectWindow("Blue"); rename("2"); min[0]=0; max[0]=0; filter[0]="stop"; min[1]=60; max[1]=255; filter[1]="pass"; min[2]=0; max[2]=0; filter[2]="stop"; for (i=0;i&lt;3;i++){</pre> | <pre>// Color Thresholder 1.53k // Autogenerated macro, single images only! min=newArray(3); max=newArray(3); filter=newArray(3); a=getTitle(); run("RGB Stack"); run("Convert Stack to Images"); selectWindow("Red"); rename("0"); selectWindow("Green"); rename("1"); selectWindow("Blue"); rename("2"); min[0]=0; max[0]=0; filter[0]="stop"; min[1]=0; max[1]=0; filter[1]="stop"; min[2]=125; max[2]=255; filter[2]="pass"; for (i=0;i&lt;3;i++){</pre> |

|                                                                                                                                                                                                                                                                                                                                                                                                                       |                                                                                                                                                                                                                                                                                                                                                                                                                       |
|-----------------------------------------------------------------------------------------------------------------------------------------------------------------------------------------------------------------------------------------------------------------------------------------------------------------------------------------------------------------------------------------------------------------------|-----------------------------------------------------------------------------------------------------------------------------------------------------------------------------------------------------------------------------------------------------------------------------------------------------------------------------------------------------------------------------------------------------------------------|
| <pre> selectWindow(""+i); setThreshold(min[i], max[i]); run("Convert to Mask"); if (filter[i]=="stop")  run("Invert"); } imageCalculator("AND create", "0","1"); imageCalculator("AND create", "Result of 0","2"); for (i=0;i&lt;3;i++){   selectWindow(""+i);   close(); } selectWindow("Result of 0"); close(); selectWindow("Result of Result of 0"); rename(a); // Colour Thresholding----- run("Invert"); </pre> | <pre> selectWindow(""+i); setThreshold(min[i], max[i]); run("Convert to Mask"); if (filter[i]=="stop")  run("Invert"); } imageCalculator("AND create", "0","1"); imageCalculator("AND create", "Result of 0","2"); for (i=0;i&lt;3;i++){   selectWindow(""+i);   close(); } selectWindow("Result of 0"); close(); selectWindow("Result of Result of 0"); rename(a); // Colour Thresholding----- run("Invert"); </pre> |
|-----------------------------------------------------------------------------------------------------------------------------------------------------------------------------------------------------------------------------------------------------------------------------------------------------------------------------------------------------------------------------------------------------------------------|-----------------------------------------------------------------------------------------------------------------------------------------------------------------------------------------------------------------------------------------------------------------------------------------------------------------------------------------------------------------------------------------------------------------------|

**Table S2:** List of Abbreviations

|             |   |                                                                           |
|-------------|---|---------------------------------------------------------------------------|
| AF          | - | autofluorescence                                                          |
| AF-SC       | - | autofluorescence of the stratum corneum                                   |
| AI          | - | active ingredient(s)                                                      |
| AROSA-value | - | intensity (MGV/px) after the removal of the skin's autofluorescence-value |
| BP          | - | broad pass                                                                |
| LP          | - | long pass                                                                 |
| MGV/px      | - | mean grey value/pixel                                                     |
| MPD         | - | mean penetration depth                                                    |
| RSD         | - | relative standard deviation                                               |
| SC          | - | stratum corneum                                                           |
| SCT         | - | stratum corneum thickness                                                 |
| SD          | - | standard deviation                                                        |
| TEWL        | - | transepidermal water loss                                                 |
